# Supplementary material for: Degradation of CH3NH3PbI3 perovskite materials by localized charges and its polarity dependency
Source: Royal Society of Chemistry journal article supplement (doi:10.1039/c9ta03180d), 2019-01-01
Supplement: c9ta03180d1.pdf [file c9ta03180d1.pdf]

Electronic Supplementary Information

## **Degradation of CH<sub>3</sub>NH<sub>3</sub>PbI<sub>3</sub> perovskite materials by localized charges and its polarity dependency**

*Min-cheol Kim<sup>a†</sup>, Namyoung Ahn<sup>a†</sup>, Eunhak Lim<sup>b</sup>, Young Un Jin<sup>c</sup>, Peter V. Pikhitsa<sup>a</sup>, Jiyoung Heo<sup>d</sup>, Seong Keun Kim<sup>b</sup>, Hyun Suk Jung<sup>c\*</sup> and Mansoo Choi<sup>a,e\*</sup>*

<sup>a</sup>Global Frontier Center for Multiscale Energy Systems, Seoul National University, Seoul, Republic of Korea.

<sup>b</sup>Department of Chemistry, Seoul National University, Seoul, Republic of Korea.

<sup>c</sup>School of Advanced Materials Science & Engineering, Sungkyunkwan University, Suwon, Gyeonggi-do, Republic of Korea.

<sup>d</sup>Department of Green Chemical Engineering, Sangmyung University, Seoul, Republic of Korea.

<sup>e</sup>Department of Mechanical Engineering, Seoul National University, Seoul, Republic of Korea.

<sup>†</sup>These authors contributed equally to this work.

\*Correspondence and request for materials should be addressed to H.S.J, and M. C.

(email: [hsjung1@skku.edu](mailto:hsjung1@skku.edu); [mchoi@snu.ac.kr](mailto:mchoi@snu.ac.kr))

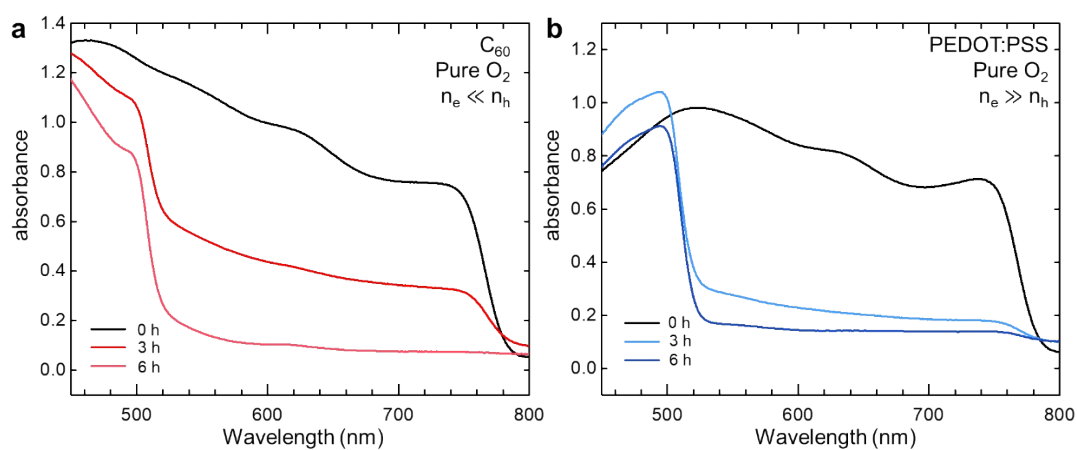

**Supplementary Figure 1.** Time evolution of absorption spectra for (a) the  $C_{60}$ /MAPbI<sub>3</sub> and (b) the PEDOT:PSS/MAPbI<sub>3</sub> half devices in chamber filled with pure  $O_2$  gas before and after light-illumination for 6 h.

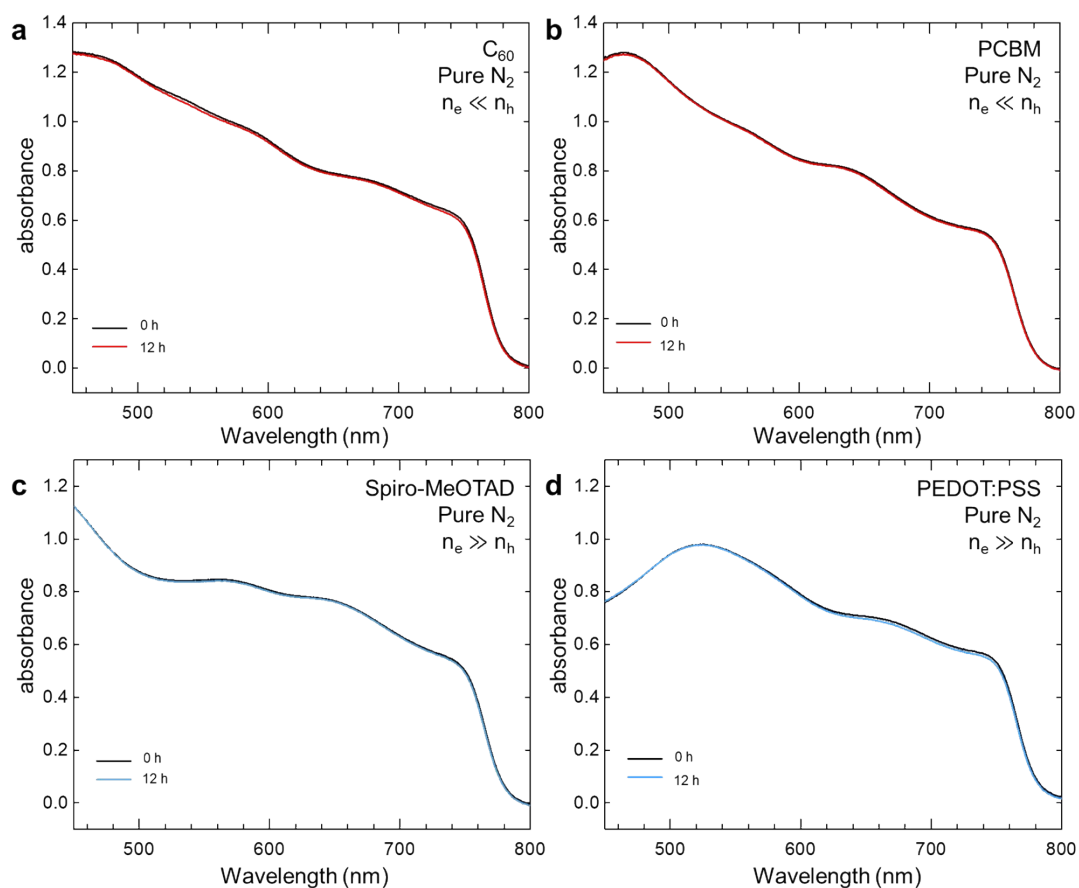

**Supplementary Figure 2.** Absorption spectra of perovskite films deposited on (a) C<sub>60</sub>, (b) PCBM, and perovskite films deposited on (c) Spiro-MeOTAD and (d) PEDOT:PSS in chamber filled with pure N<sub>2</sub> gas before and after light-illumination for 12 h.

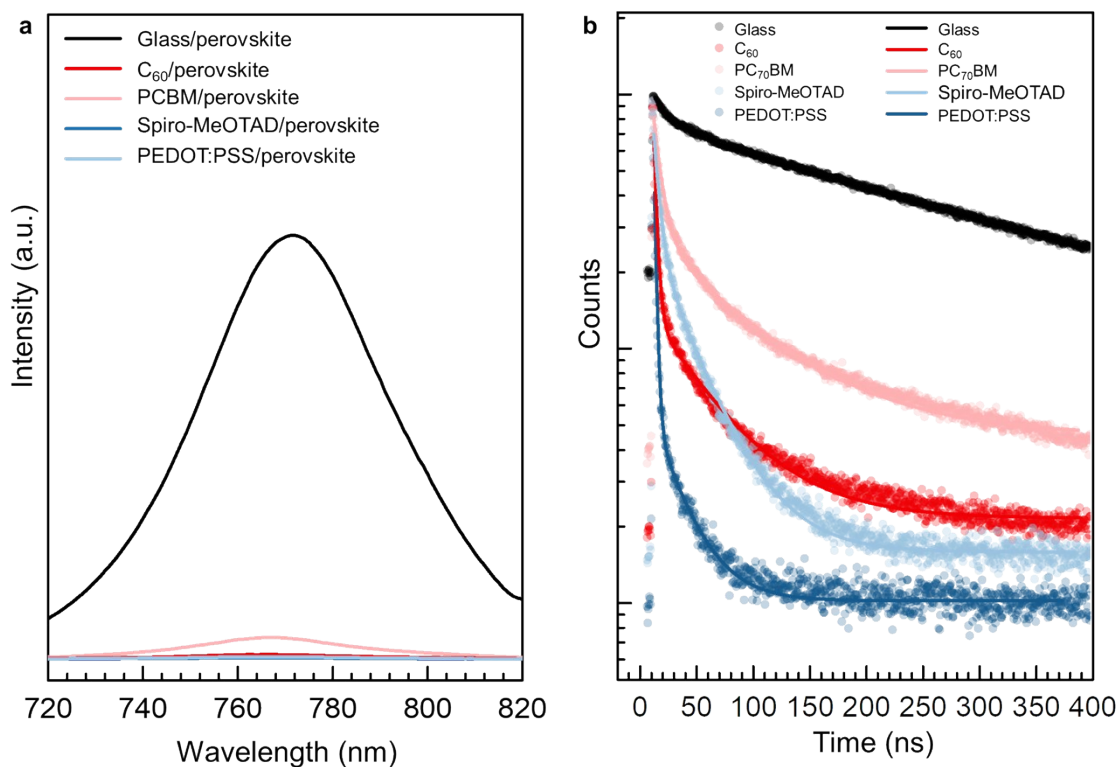

**Supplementary Figure 3.** (a) Steady-state and (b) time-resolved PL spectra obtained for the perovskite films deposited on the glass, PCBM, C<sub>60</sub>, Spiro-MeOTAD, and PEDOT:PSS substrates and fitted with the three-term exponential decay function. Time-resolved PL spectra is plotted as circle, and fitted function is plotted as line.

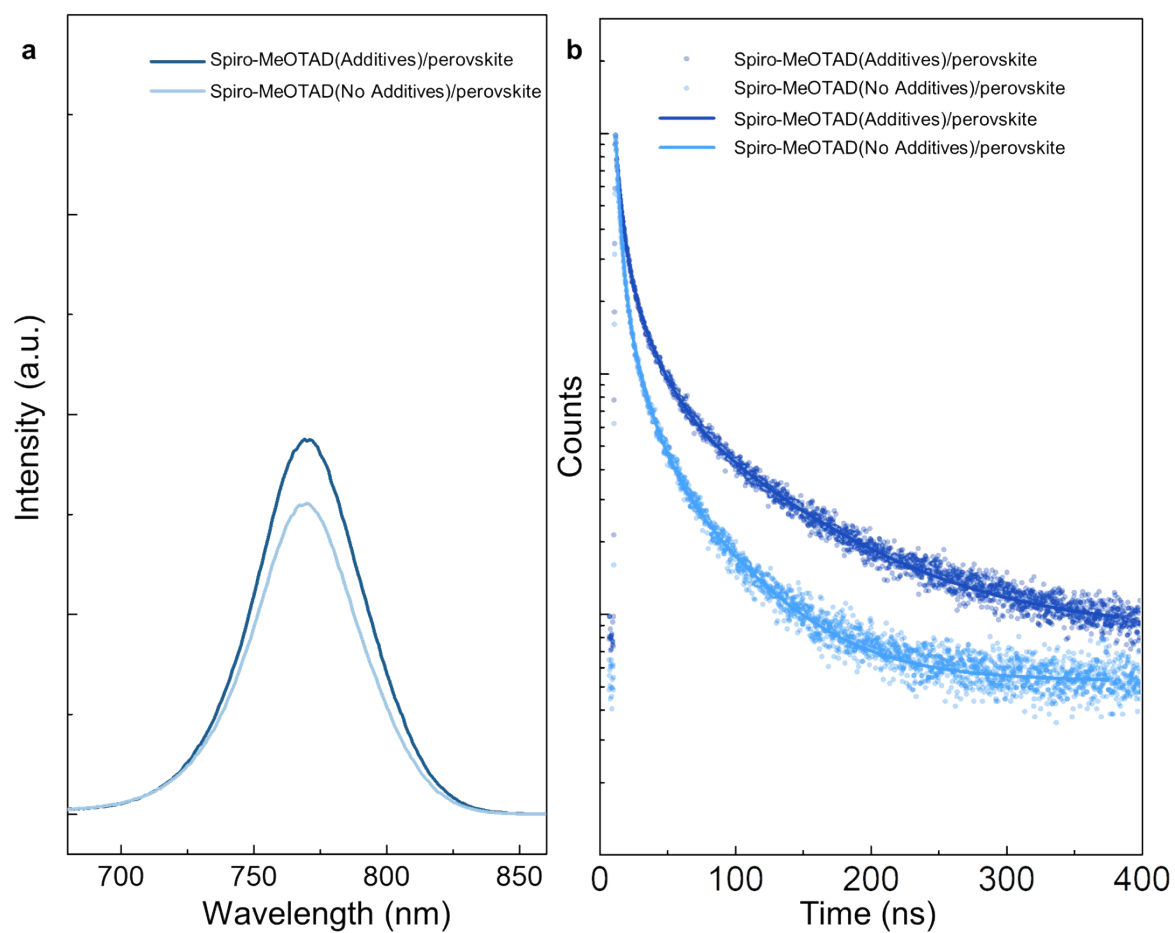

**Supplementary Figure 4.** (a) Steady-state and (b) time-resolved PL spectra obtained for the perovskite films deposited on the Spiro-MeOTAD with and without additives (such as tBP and Li-TFSI). The data fitted with the three-term exponential decay function.

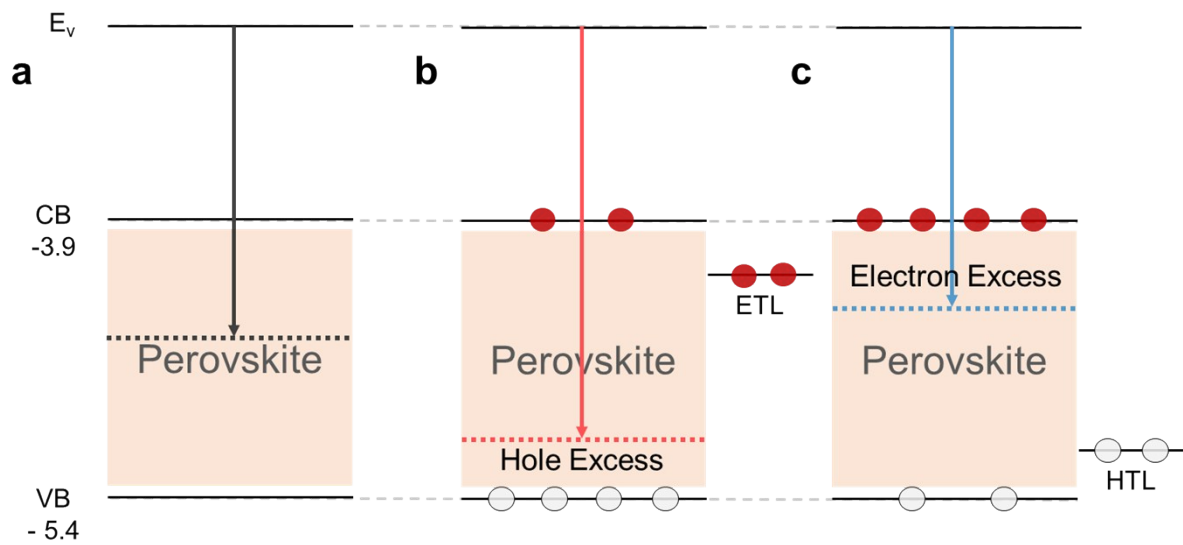

**Supplementary Figure 5.** Band energy diagram for perovskite films deposited on (a) glass, (b) ETL, and (c) HTL. Quasi fermi level of each films altered due to imbalance of electron-hole carrier concentration. Hole-excess perovskite film deposited on ETL presented lower quasi fermi level, therefore higher surface potential (work function). On the other hands, electron-excess perovskite film on HTL showed lower surface potential.

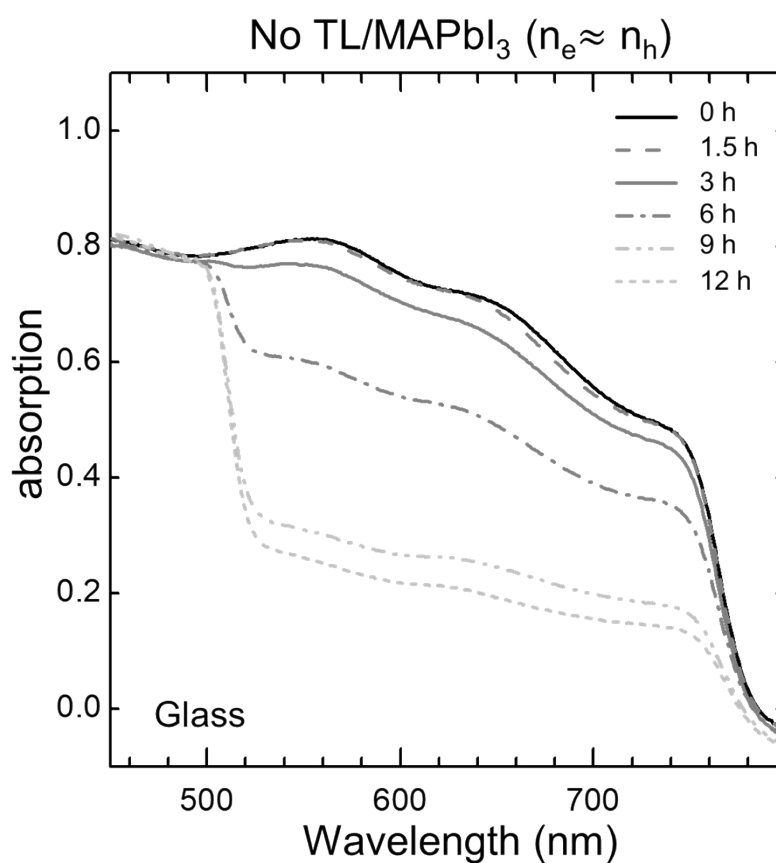

**Supplementary Figure 6.** Time evolution of absorption spectra for glass/MAPbI<sub>3</sub> film in chamber filled with O<sub>2</sub> and H<sub>2</sub>O (~80% R.H.) gas before and after light-illumination for 12 h.

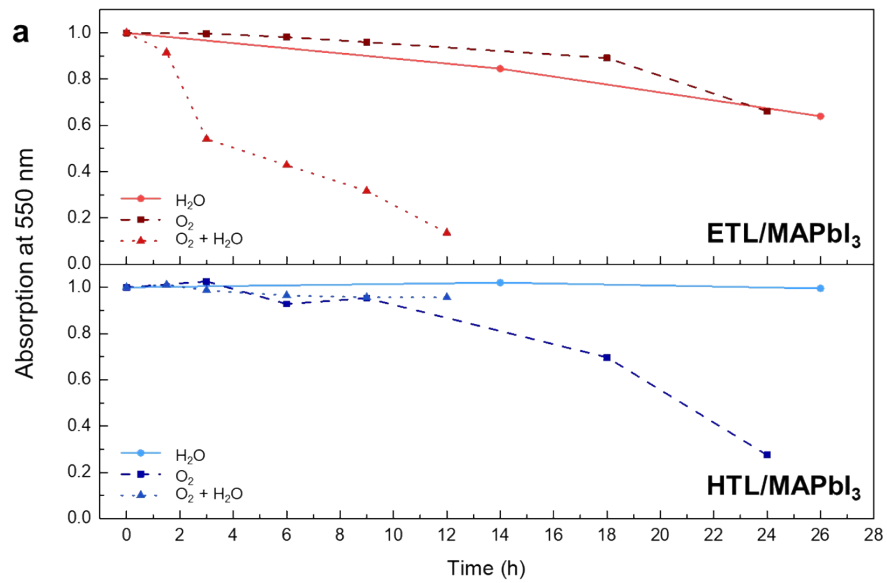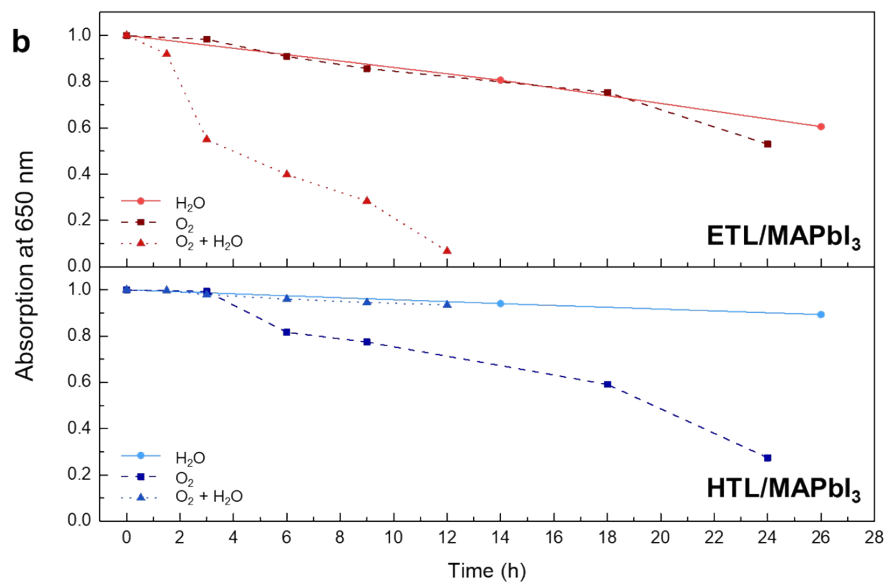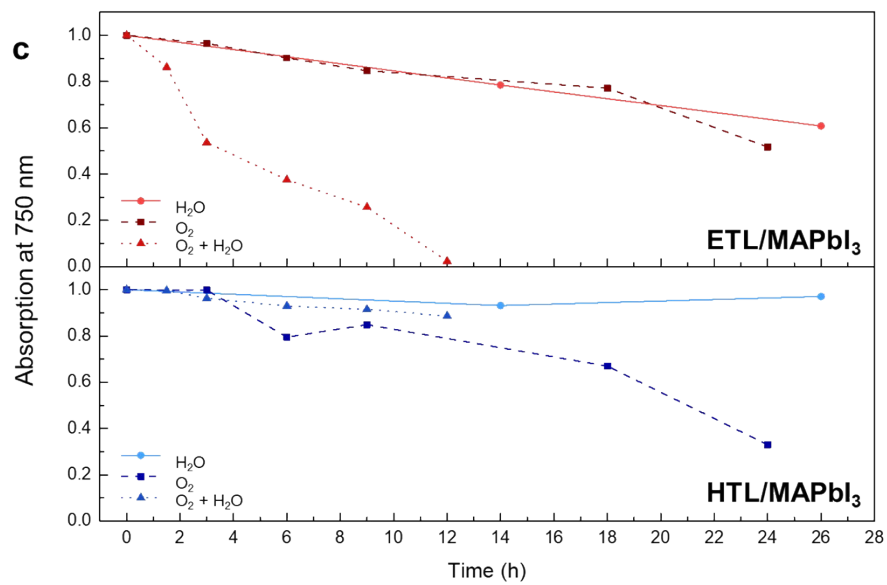



**Supplementary Figure 7.** Summary of time evolution normalized absorption spectra at (a) 550 nm, (b) 650 nm, and (c) 750 nm wavelength for ETL/MAPbI<sub>3</sub> and HTL/MAPbI<sub>3</sub> under 3 different ambient conditions (the mixture ambient, O<sub>2</sub> (20%) ambient and H<sub>2</sub>O (R.H. ~80%) ambient).

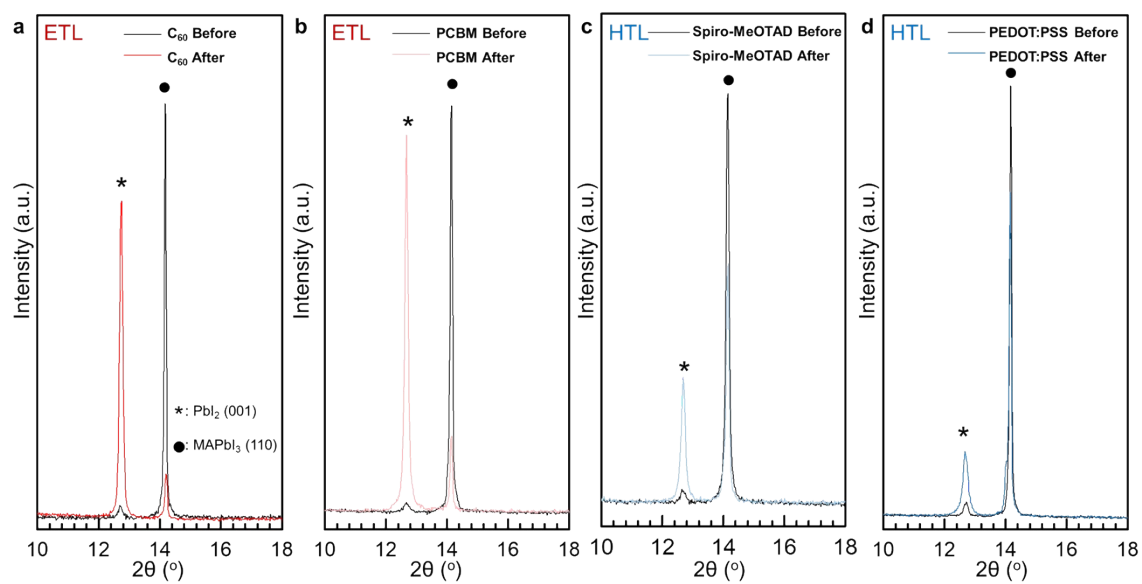

**Supplementary Figure 8.** XRD reflections of the (a) C<sub>60</sub>, (b) PCBM, (c) Spiro-MeOTAD, and (d) PEDOT:PSS phases in the 2θ range of 10–18°. PbI<sub>2</sub> species are detected at 12.7°, and MAPbI<sub>3</sub> species are detected at 14.2°.

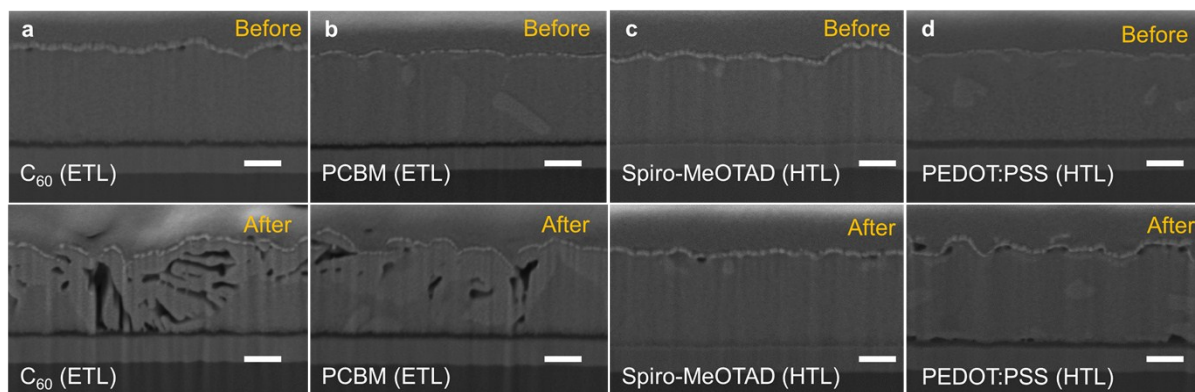

**Supplementary Figure 9.** The cross-sectional SEM images of the (a) C<sub>60</sub>, (b) PCBM, (c) Spiro-MeOTAD, and (d) PEDOT:PSS layers obtained by using a focused ion beam before and after light exposure for 3 h. All scale bars are equal to 200 nm.

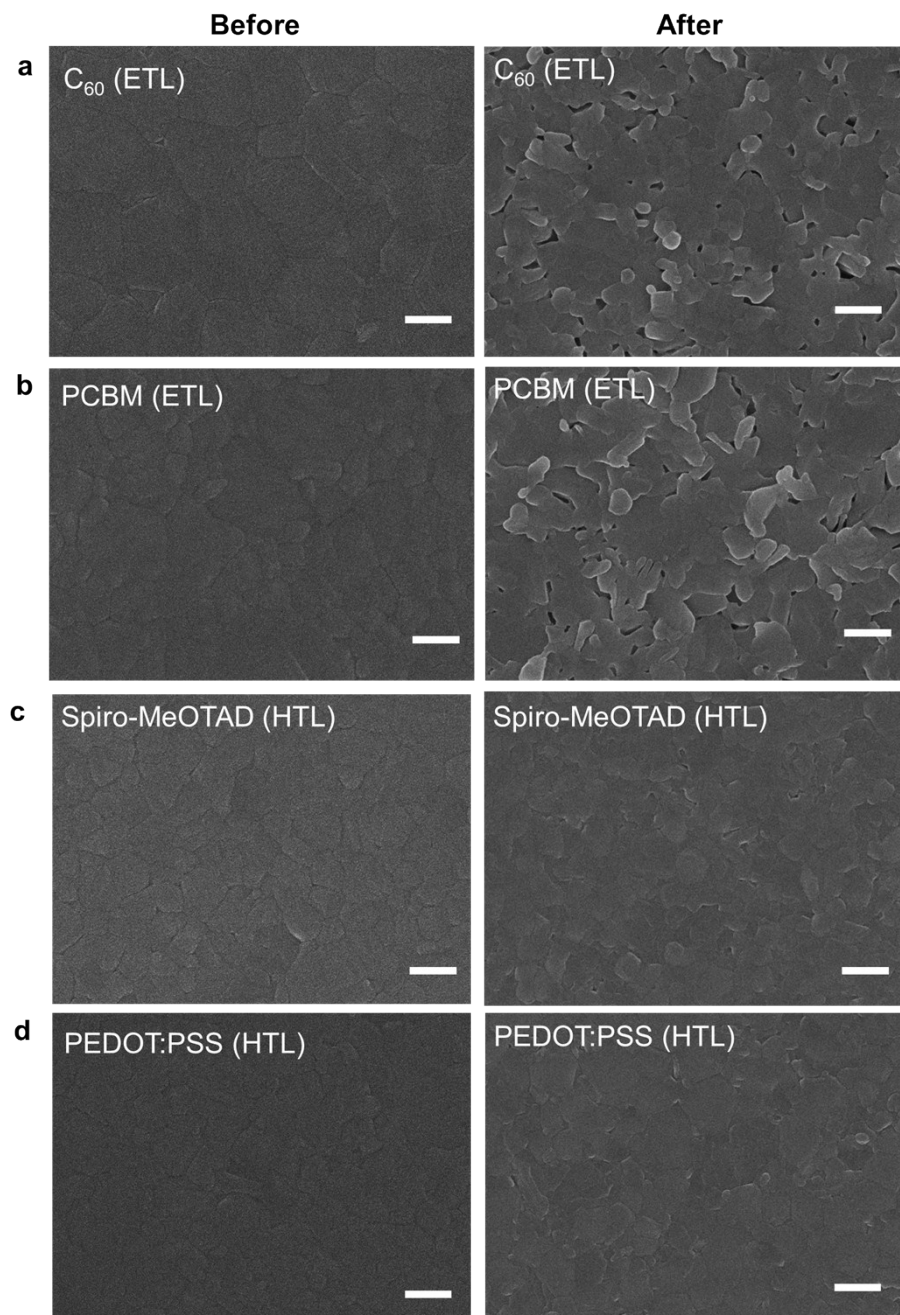

**Supplementary Figure 10.** Plane-view SEM images of the perovskite layers deposited on the (a) C<sub>60</sub>, (b) PCBM, (c) Spiro-MeOTAD, and (d) PEDOT:PSS substrates before and after 6 h of light-soaking. All scale bars are equal to 300 nm.

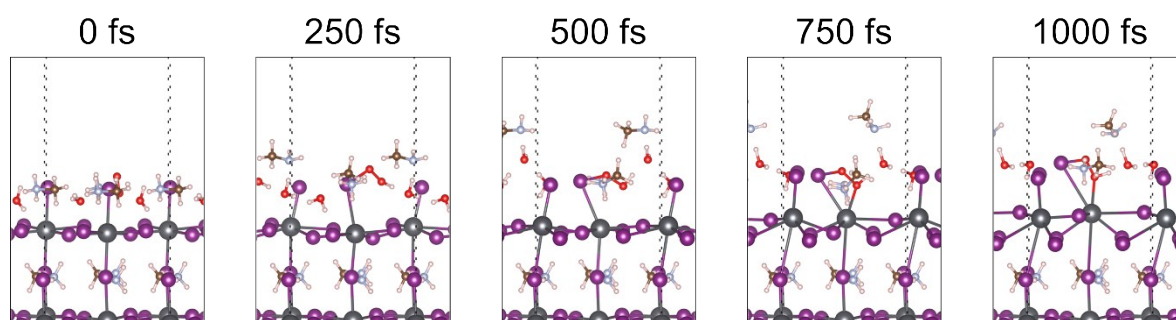

**Supplementary Figure 11.** Temporal snapshots of the AIMD simulated atomic geometries of MAPbI<sub>3</sub> crystal with a charge of +1 in the presence of two water and one oxygen molecules.

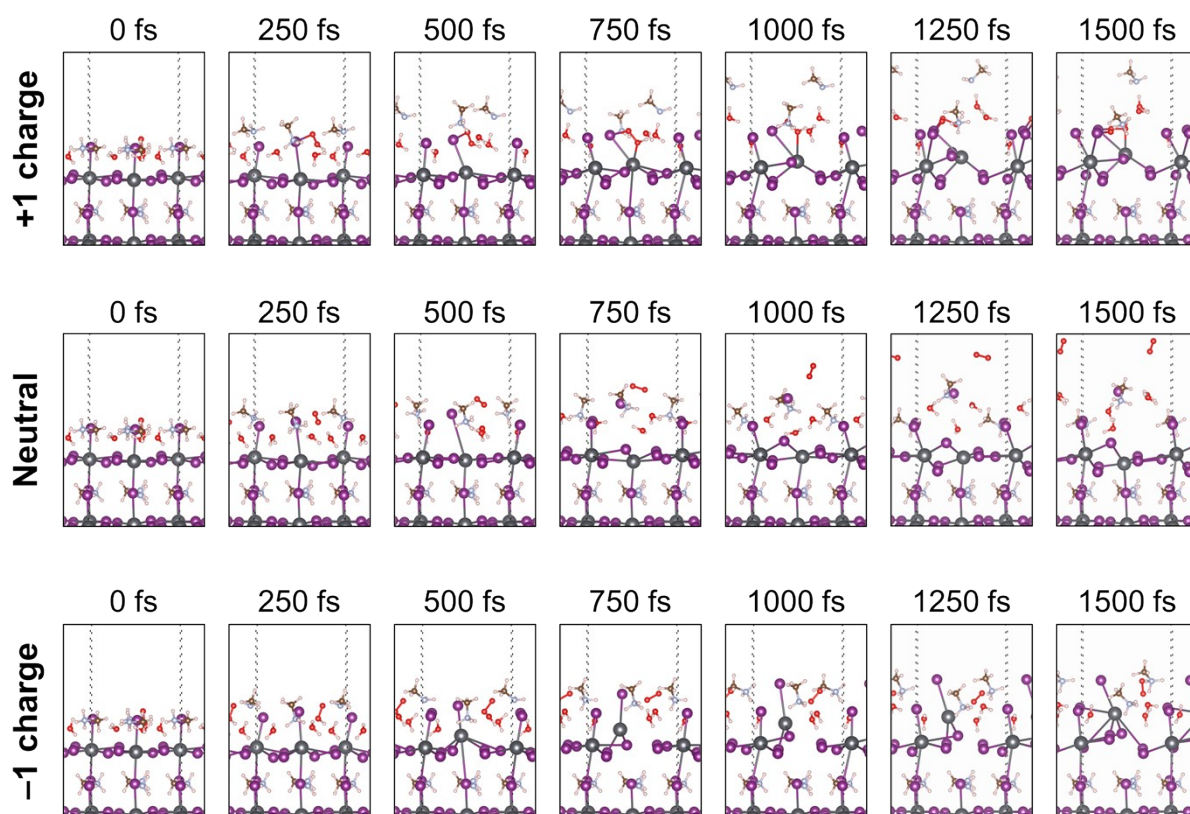

**Supplementary Figure 12.** Temporal snapshots of the AIMD simulation of MAPbI<sub>3</sub> crystal in the presence of three water and one oxygen molecules for 1.5 picoseconds.

|                       | <b>A<sub>1</sub>(%)</b> | <b>τ<sub>1</sub> (ns)</b> | <b>A<sub>2</sub>(%)</b> | <b>τ<sub>2</sub> (ns)</b> | <b>A<sub>3</sub>(%)</b> | <b>τ<sub>3</sub> (ns)</b> | <b>Avg. τ</b> |
|-----------------------|-------------------------|---------------------------|-------------------------|---------------------------|-------------------------|---------------------------|---------------|
| <b>Glass</b>          | 0.36                    | 7.87                      | 1.64                    | 31.95                     | 98.00                   | 332.89                    | 332.38        |
| <b>C<sub>60</sub></b> | 13.93                   | 1.99                      | 26.65                   | 22.02                     | 59.42                   | 103.82                    | 96.33         |
| <b>PCBM</b>           | 6.80                    | 3.86                      | 24.24                   | 28.96                     | 68.96                   | 151.07                    | 143.03        |
| <b>PEDOT:PSS</b>      | 12.11                   | 3.76                      | 48.01                   | 20.99                     | 48.01                   | 52.69                     | 43.15         |
| <b>Spiro-MeOTAD</b>   | 25.88                   | 1.47                      | 20.82                   | 5.17                      | 53.30                   | 32.97                     | 30.77         |

**Supplementary Table 1.** A summary of the time-resolved PL lifetime parameters obtained for the glass, C<sub>60</sub>, PCBM, PEDOT:PSS, and Spiro-MeOTAD/perovskite systems described in Supplementary

$$\tau_{avg} = \frac{\sum_i A_i \tau_i^2}{\sum_i A_i \tau_i}$$

Figure 2b. Intensity weighted average lifetime was calculated by

| <b>Bottom Layer</b>      |        | <b>PbI<sub>2</sub></b><br>(12.7°) | <b>MAPbI<sub>3</sub></b><br>(14.2°) |
|--------------------------|--------|-----------------------------------|-------------------------------------|
| C <sub>60</sub><br>(ETL) | Before | 428                               | 7867                                |
|                          | After  | 6077                              | 1031                                |
|                          | Ratio  | 18.38                             | 17.0%                               |
| PCBM<br>(ETL)            | Before | 632                               | 9895                                |
|                          | After  | 9215                              | 2181                                |
|                          | Ratio  | 14.58                             | 22.0%                               |
| Spiro-MeOTAD<br>(HTL)    | Before | 651                               | 7599                                |
|                          | After  | 2614                              | 4612                                |
|                          | Ratio  | 4.02                              | 60.7%                               |
| PEDOT:PSS<br>(HTL)       | Before | 772                               | 13804                               |
|                          | After  | 2371                              | 10508                               |
|                          | Ratio  | 3.07                              | 76.1%                               |

**Supplementary Table 2.** XRD intensities of the PbI<sub>2</sub> (12.7°) and MAPbI<sub>3</sub> (14.2°) peaks obtained for the perovskite layers deposited on the C<sub>60</sub>, PCBM, Spiro-MeOTAD, and PEDOT:PSS substrates before and after light exposure.



|    | 0 fs  | 250 fs | 500 fs | 750 fs | 1000 fs |
|----|-------|--------|--------|--------|---------|
| Pb | +1.01 | +0.96  | +1.00  | +1.01  | +0.99   |
| I  | +0.11 | +0.36  | +0.44  | +0.41  | +0.36   |
| O1 | −0.29 | −0.41  | −0.47  | −0.50  | −0.44   |
| O2 | −0.22 | −0.62  | −0.61  | −0.62  | −0.66   |
| H1 | +0.59 | +0.64  | 0.62   | +0.62  | +0.64   |

**Supplementary Table 3.** Time evolution of Bader charge of Pb, I, O, O, and H atoms
